# Supplementary material for: Nucleosome acidic patch-targeting binuclear ruthenium compounds induce aberrant chromatin condensation
Source: PubMed Central journal article supplement (PMC5691193; doi:10.1038/s41467-017-01680-4), 2017-11-17
Supplement: 41467_2017_1680_MOESM3_ESM.pdf [file 41467_2017_1680_MOESM3_ESM.pdf]

## Description of Additional Supplementary Files

File Name: Supplementary Movie 1

Description: Control, untreated cells. Live fluorescence imaging of drug- and binuclear-treated cells over the course of 24 h. Nuclear chromatin is visible by virtue of the incorporated H2B-EGFP histone fusion protein. Frames have been selected to show cell division (untreated) or a cellular crisis event (aberrant chromatin condensation/apoptosis).

File Name: Supplementary Movie 2

Description: Cisplatin-treated. Live fluorescence imaging of drug- and binuclear-treated cells over the course of 24 h. Nuclear chromatin is visible by virtue of the incorporated H2B-EGFP histone fusion protein. Frames have been selected to show cell division (untreated) or a cellular crisis event (aberrant chromatin condensation/apoptosis).

File Name: Supplementary Movie 3

Description: RAPTAC-treated. Live fluorescence imaging of drug- and binuclear-treated cells over the course of 24 h. Nuclear chromatin is visible by virtue of the incorporated H2B-EGFP histone fusion protein. Frames have been selected to show cell division (untreated) or a cellular crisis event (aberrant chromatin condensation/apoptosis).

File Name: Supplementary Movie 4

Description: PEG-treated. Live fluorescence imaging of drug- and binuclear-treated cells over the course of 24 h. Nuclear chromatin is visible by virtue of the incorporated H2B-EGFP histone fusion protein. Frames have been selected to show cell division (untreated) or a cellular crisis event (aberrant chromatin condensation/apoptosis).

File Name: Supplementary Movie 5

Description: RR-treated. Live fluorescence imaging of drug- and binuclear-treated cells over the course of 24 h. Nuclear chromatin is visible by virtue of the incorporated H2B-EGFP histone fusion protein. Frames have been selected to show cell division (untreated) or a cellular crisis event (aberrant chromatin condensation/apoptosis).

File Name: Supplementary Movie 6

Description: C2-treated. Live fluorescence imaging of drug- and binuclear-treated cells over the course of 24 h. Nuclear chromatin is visible by virtue of the incorporated H2B-EGFP histone fusion protein. Frames have been selected to show cell division (untreated) or a cellular crisis event (aberrant chromatin condensation/apoptosis).

File Name: Supplementary Movie 7

Description: C10-treated. Live fluorescence imaging of drug- and binuclear-treated cells over the course of 24 h. Nuclear chromatin is visible by virtue of the incorporated H2B-EGFP histone fusion protein. Frames have been selected to show cell division (untreated) or a cellular crisis event (aberrant chromatin condensation/apoptosis).
